# Supplementary material for: Identifying Forest Structural Types along an Aridity Gradient in Peninsular Spain: Integrating Low-Density LiDAR, Forest Inventory, and Aridity Index
Source: MDPI journal article supplement (doi:10.3390/rs14010235), 2022-01-05
Supplement: s1 [file s1]

## Supplementary materials

**Table S1.** Number of pixels and percentages (in brackets) of each structural type by province with balanced classes. SCS: Sclerophyllous stands; AOW: Agrosilvopastoral and/or Open Woodlands; COP: Coppices and oromediterranean pines; HMS: High mountain species.

| Province                     |     | Badajoz            | Murcia             | Madrid            | La Rioja          | Total pixels       |
|------------------------------|-----|--------------------|--------------------|-------------------|-------------------|--------------------|
| FOREST<br>STRUCTURAL<br>TYPE | SCS | 8764<br>(0.29)     | 1255<br>(0.10)     | 34896<br>(3.16)   | 32176<br>(4.01)   | 77091<br>(1.23)    |
|                              | AOW | 1221209<br>(39.64) | 183256<br>(14.43)  | 267916<br>(24.18) | 233101<br>(28.93) | 1905482<br>(30.3)  |
|                              | COP | 1868027<br>(60.18) | 1082661<br>(85.28) | 750738<br>(67.76) | 332828<br>(41.30) | 4034254<br>(64.17) |
|                              | HMS | 5878<br>(0.19)     | 2417<br>(0.19)     | 54357<br>(4.90)   | 207601<br>(25.76) | 270253<br>(4.3)    |
| Total pixels                 |     | 3103878            | 1269589            | 1107907           | 805706            | 6287080            |
| % Pixels                     |     | 49.37              | 20.19              | 17.62             | 12.82             | 100                |

**Table S2.** Number of pixels and percentages (in brackets) of each structural type by province with no balanced classes. SCS: Sclerophyllous stands; AOW: Agrosilvopastoral and/or Open Woodlands; COP: Coppices and oromediterranean pines; HMS: High mountain species.

| Province                     |     | Badajoz            | Murcia            | Madrid            | La Rioja          | Total pixels       |
|------------------------------|-----|--------------------|-------------------|-------------------|-------------------|--------------------|
| FOREST<br>STRUCTURAL<br>TYPE | SCS | 2793<br>(0.09)     | 128 (0.01)        | 11853<br>(1.06)   | 15873<br>(1.97)   | 30647<br>(0.49)    |
|                              | AOW | 1087288<br>(35.03) | 147145<br>(11.59) | 341678<br>(30.84) | 198606<br>(24.65) | 1774717<br>(28.22) |
|                              | COP | 2011934<br>(64.82) | 1121047<br>(88.3) | 692720<br>(62.48) | 436370<br>(54.16) | 4262071<br>(67.79) |
|                              | HMS | 1863<br>(0.06)     | 1269<br>(0.10)    | 61656<br>(5.52)   | 154857<br>(19.22) | 219645<br>(3.49)   |
| Total pixels                 |     | 3103878            | 1269589           | 1107907           | 805706            | 6287080            |
| % Pixels                     |     | 49.37              | 20.19             | 17.62             | 12.82             | 100                |

**Table S3.** LiDAR metrics and abbreviations.

| LiDAR          | Abbreviations | LiDAR         | Abbreviations | LiDAR                                               | Abbreviations |
|----------------|---------------|---------------|---------------|-----------------------------------------------------|---------------|
| Maximum height | H max         | Percentile 25 | P25           | % First return above the mode                       | %FR/Md        |
| Mean height    | Hmean         | Percentile 30 | P30           | (All return above the mean/Total first returns)*100 | AMn/FR        |

|                                 |       |                                                      |      |                                                     |           |
|---------------------------------|-------|------------------------------------------------------|------|-----------------------------------------------------|-----------|
| Mode height                     | Hmode | Percentile 40                                        | P40  | (All return above the mode/Total first returns)*100 | AMd       |
| Variance height                 | Hvar  | Percentile 50                                        | P50  | Height range                                        | HR        |
| Interquartile range height      | Hiq   | Percentile 60                                        | P60  | Canopy length                                       | C         |
| Standard deviation height       | Hsd   | Percentile 75                                        | P75  | Difference between Percentile 99 and 50             | Dif 99_50 |
| Coefficient of variation height | Hcv   | Percentile 90                                        | P90  | Difference between Percentile 99 and 25             | Dif 99_25 |
| Skewness height                 | Hsk   | Percentile 95                                        | P95  | Difference between Percentile 90 and 50             | Dif 90_50 |
| Kurtosis height                 | Hkur  | Percentile 99                                        | P99  | Difference between Percentile 90 and 25             | Dif 90_25 |
| L - Coefficient of variation    | L-cv  | Canopy Relief Ratio                                  | CRR  | Fractional Cover                                    | FC        |
| L - Skewness height             | L-sk  | % First return above 2 meters                        | %2M  | Mean Height of the Canopy Profile                   | MCPH      |
| L - Kurtosis height             | L-kur | % All return above 2 meters                          | %A2  | Quadratic Mean Canopy Height                        | QMCH      |
| Plant Area Index                | PAI   | (All return above 2 meters/Total first returns) *100 | CCM2 | Area under the canopy curve                         | AC        |
| Percentile 5                    | P05   | % First return above the mean                        | %FR  |                                                     |           |

**Table S4.** Kruskal-Wallis rank sum test.

| Martonne aridity gradient by Forest structural types |           |
|------------------------------------------------------|-----------|
| chi-squared                                          | 1149.9    |
| df                                                   | 3         |
| p-value                                              | < 2.2e-16 |

**Table S5.** Pairwise comparisons using Wilcoxon rank sum test with continuity correction. P-value adjustment method: holm. SCS: Sclerophyllous stands; AOW: Agrosilvopastoral and/or Open Woodlands; COP: Coppices and oromediterranean pines; HMS: High mountain species.

| Martonne aridity gradient by Forest structural types |        |        |        |
|------------------------------------------------------|--------|--------|--------|
|                                                      | SCS    | AOW    | COP    |
| AOW                                                  | <2e-16 | -      | -      |
| COP                                                  | <2e-16 | <2e-16 | -      |
| HMS                                                  | <2e-16 | <2e-16 | <2e-16 |

**Table S6.** Contingency table for the training dataset. T3: Forest structural type 1; T2: Forest structural type 2; T3: Forest structural type 3; T4: Forest structural type 4.

| CONTINGENCY TABLE (Training set: 70% of total observations) |          |       |       |       |                    |                        |                         |
|-------------------------------------------------------------|----------|-------|-------|-------|--------------------|------------------------|-------------------------|
| Predicted                                                   | Observed |       |       |       |                    | USER'S<br>ACCURACY (%) | COMMISSION<br>ERROR (%) |
|                                                             | SCS      | AOW   | COP   | HMS   | TOTAL              |                        |                         |
| SCS                                                         | 661      | 209   | 125   | 61    | 1056               | 62,59                  | 37,41                   |
| AOW                                                         | 75       | 136   | 16    | 37    | 264                | 51,51                  | 48,49                   |
| COP                                                         | 24       | 15    | 107   | 67    | 213                | 50,23                  | 49,77                   |
| HMS                                                         | 28       | 47    | 81    | 240   | 396                | 60,60                  | 39,40                   |
| TOTAL                                                       | 788      | 407   | 329   | 405   | 1929               |                        |                         |
| PRODUCER'S<br>ACCURACY (%)                                  | 83,88    | 33,41 | 32,52 | 59,25 | TOTAL ACCURACY (%) |                        | 59,30                   |
| OMISSION<br>ERROR (%)                                       | 16,12    | 66,59 | 67,48 | 40,75 | TOTAL ERROR (%)    |                        | 40,70                   |

**Table S7.** Contingency table for the training dataset. SCS: Sclerophyllous stands; AOW: Agrosilvopastoral and/or Open Woodlands; COP: Coppices and oromediterranean pines; HMS: High mountain species.

| CONTINGENCY TABLE (Validation set: 70% of total observations) |          |       |       |       |                    |                           |                        |
|---------------------------------------------------------------|----------|-------|-------|-------|--------------------|---------------------------|------------------------|
| Predicted                                                     | Observed |       |       |       |                    | USER'S<br>ACCURACY<br>(%) | COMISSION<br>ERROR (%) |
|                                                               | SCS      | AOW   | COP   | HMS   | TOTAL              |                           |                        |
| SCS                                                           | 283      | 90    | 62    | 35    | 470                | 60,21                     | 39,79                  |
| AOW                                                           | 20       | 67    | 2     | 10    | 99                 | 67,67                     | 32,33                  |
| COP                                                           | 17       | 9     | 55    | 30    | 111                | 49,54                     | 50,46                  |
| HMS                                                           | 19       | 13    | 18    | 97    | 147                | 65,98                     | 34,02                  |
| TOTAL                                                         | 339      | 179   | 137   | 172   | 827                |                           |                        |
| PRODUCER'S<br>ACCURACY (%)                                    | 83,48    | 37,43 | 40,14 | 56,39 | TOTAL ACCURACY (%) |                           | 60,70                  |
| OMISSION<br>ERROR (%)                                         | 16,52    | 62,57 | 59,86 | 43,61 | TOTAL ERROR (%)    |                           | 39,30                  |

**Table S8.** LiDAR flight and sensor characteristics.

| Province | Sensor     | Point<br>density | Pulse<br>frequency | Scan<br>frequency | Radiometric<br>resolution | Sensor<br>calibration |
|----------|------------|------------------|--------------------|-------------------|---------------------------|-----------------------|
| Badajoz  | Leica AL80 | 1                | >45kHz             | >70Hz             | >8bits                    | <12months             |
| Murcia   | Leica AL60 | 0,5              | >45kHz             | >70Hz             | >8bits                    | <12months             |
| Madrid   | Leica AL70 | 1                | >45kHz             | >70Hz             | >8bits                    | <12months             |
| La Rioja | Leica AL80 | 2                | >45kHz             | >70Hz             | >8bits                    | <12months             |

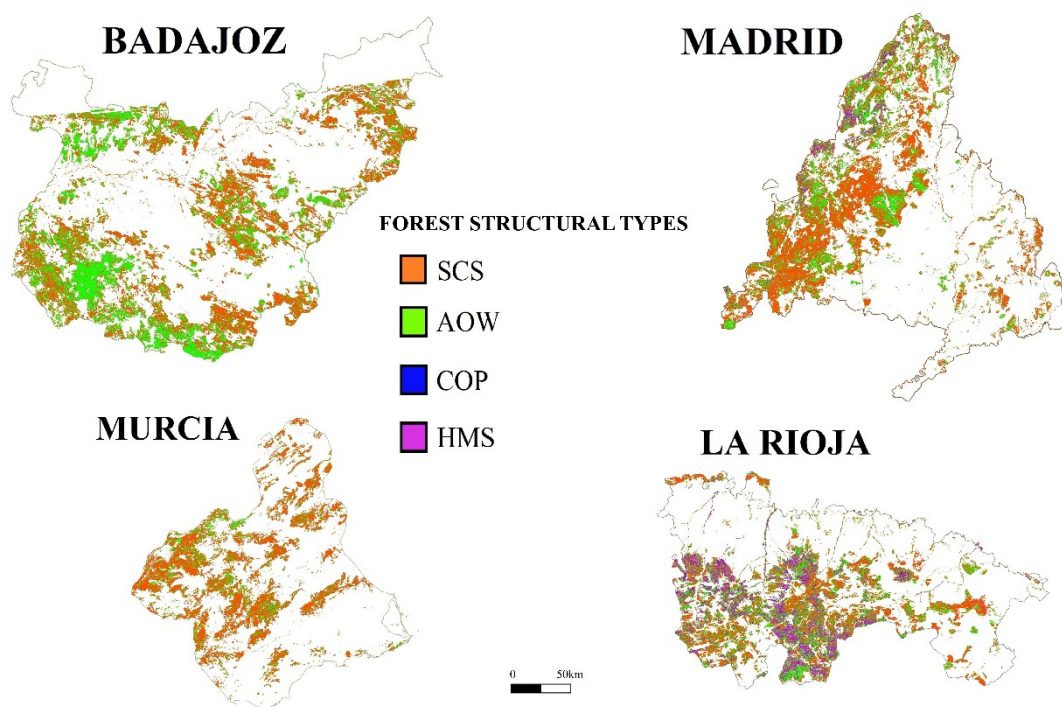

**Figure S1.** Distribution of forest structural type per province with no balanced classes. SCS: Sclerophyllous stands; AOW: Agrosilvopastoral and/or Open Woodlands; COP: Coppices and oromediterranean pines; HMS: High mountain species.

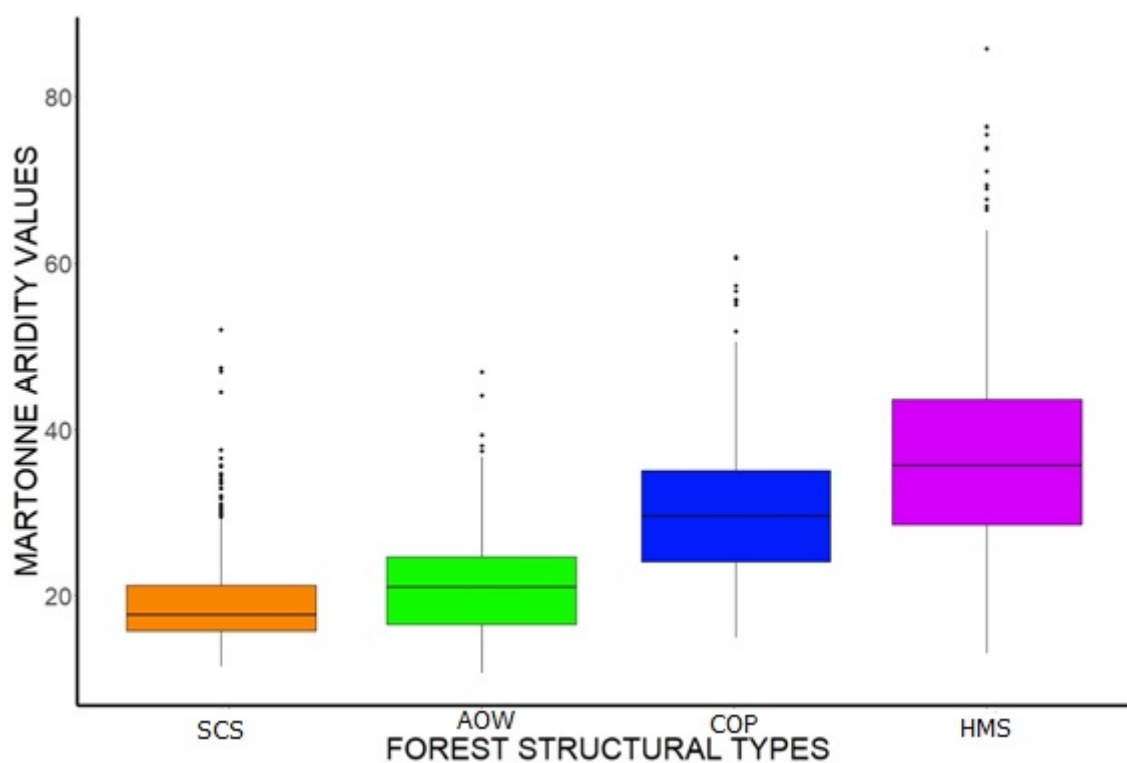

**Figure S2.** Martonne aridity index per forest structural type. SCS: Sclerophyllous stands; AOW: Agrosilvopastoral and/or Open Woodlands; COP: Coppices and oromediterranean pines; HMS: High mountain species.

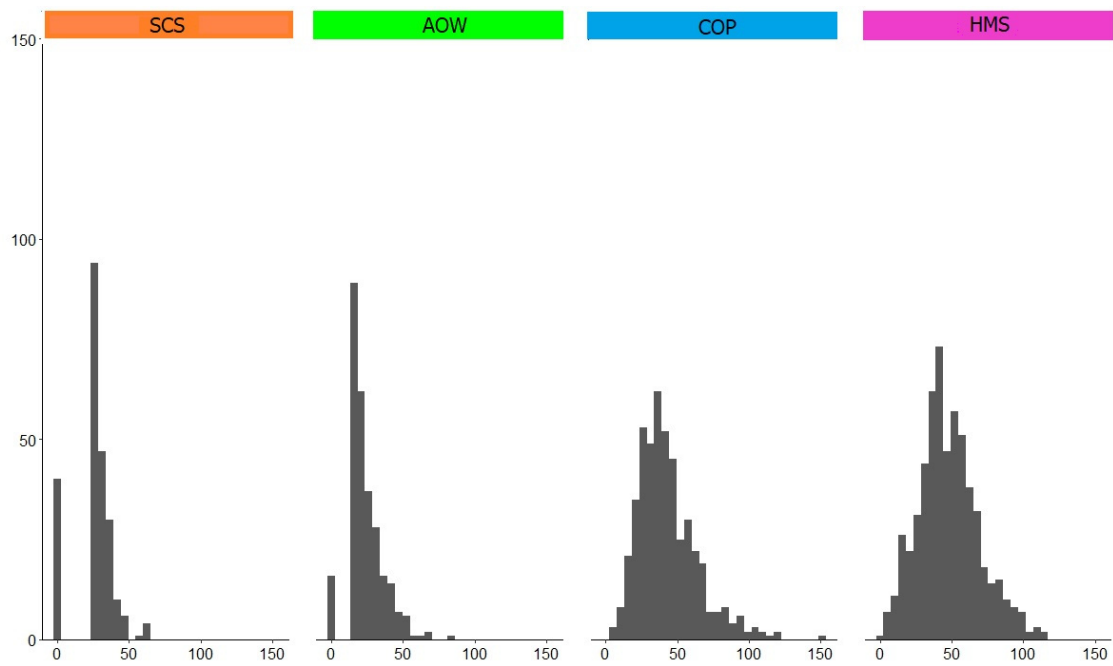

**Figure S3.** Plot basal area per hectare per cluster. SCS: Sclerophyllous stands; AOW: Agrosilvopastoral and/or Open Woodlands; COP: Coppices and oromediterranean pines; HMS: High mountain species.

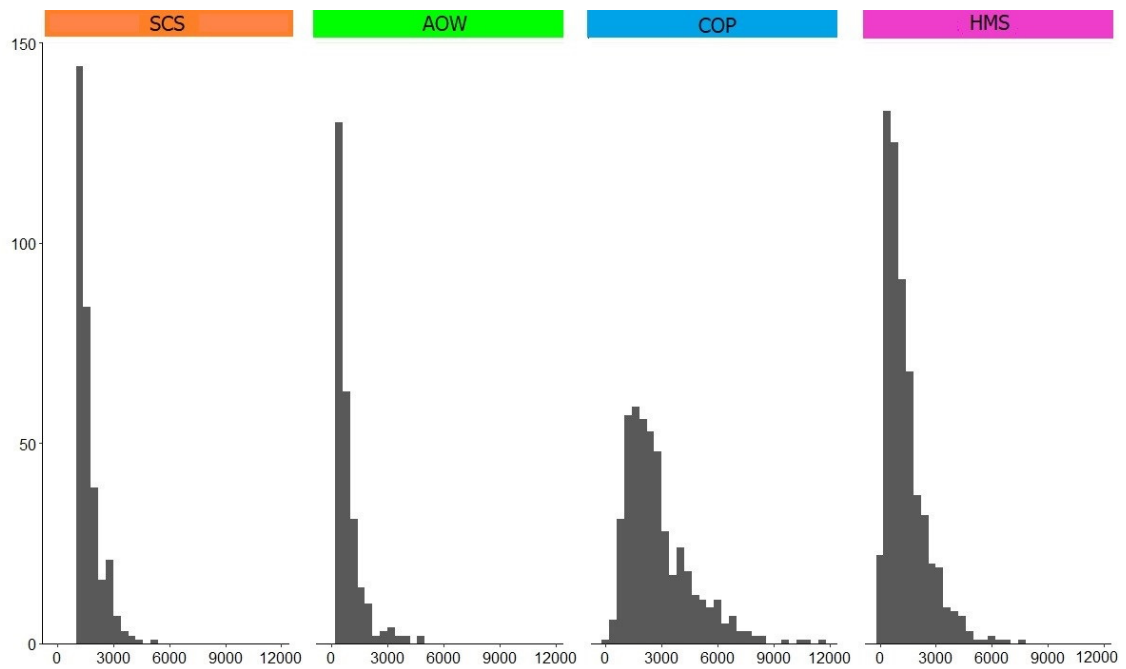

**Figure S4.** Number of trees per per hectare per cluster. SCS: Sclerophyllous stands; AOW: Agrosilvopastoral and/or Open Woodlands; COP: Coppices and oromediterranean pines; HMS: High mountain species
